# Supplementary material
Source: Springer Nature journal article supplement (https://www.springermedizin.de/resource/supplementary/13012_2013_677_MOESM1_ESM.pdf/9630504)
Supplement: MOESM1 [file 9630504]



## **PHASE 1: Project Launch**

Establish Project Executive and International Advisory Group

Establish Project Team and Engage Stakeholders  
Project Executive and CONSORT endorsement  
International Advisory Group  
Journal Editors

IAG meeting to set-up the Delphi process



## **PHASE 2: Delphi Process**

Generate List of Items for Discussion at Consensus Meeting

Round 1  
Participants score agreement with each reporting item identified at the IAG meeting  
Participants suggest items to modify or add  
Responses analysed  
Produce list of suggested items and modifications

Rounds 2 (and 3 if needed)  
Circulate results of previous Round  
Participants score agreement with modified items  
Participants suggest items to modify or add  
Responses analysed  
Produce list of suggested items and modifications

Produce items to consider at consensus meeting



## **PHASE 3: Consensus Meeting**

Finalise Checklist Items for Guideline Documents

Pre-Meeting Activities  
Recruit participants from Delphi process  
Circulate background papers and Delphi results

Meeting  
Structured discussion of each proposed item  
Participants vote on items for inclusion

Produce list of items for guideline

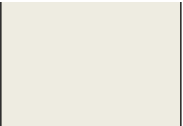

## **PHASE 4: Write-Up**

Create Guideline Documents

Draft Guideline  
Write guideline and explanation documents  
Circulate drafts electronically for review

Finalise Guideline  
Summarise feedback, refine, and circulate again  
Finalise wording and format



## **PHASE 5: Implementation**

Promote Guideline Uptake



Dissemination and Uptake  
Multiple, simultaneous publications  
Presentations about documents at conferences  
Distribute guidelines through research, practitioner, and funding networks
